1 **High prevalence of anxiety and depression among patients hospitalized with acute**  
2 **febrile illness in Sri Lanka**

3

4 Champica K. Bodinayake<sup>1,3</sup>, Ajith De. Silva Nagahawatta<sup>1,3</sup>, Wasana S. Ranaweera  
5 Arachchige<sup>1</sup>, Senuri C Sahabandu<sup>2</sup>, Aruna H. Pushpakumara<sup>1</sup>, Piumi K. Wijyaratna<sup>1</sup>,  
6 Bhagya N. Jayasekera<sup>1</sup>, L. Gayani Tillekeratne<sup>1,3</sup>

7

8 *<sup>1</sup>Faculty of Medicine, University of Ruhuna, Galle, Sri Lanka*

9 *<sup>2</sup>Faculty of Medicine, University of Colombo, Colombo, Sri Lanka*

10 *<sup>3</sup>Duke Global Health Institute, Durham, NC, United States*

11 Corresponding author : Champica K. Bodinayake

12 E-mail: [bodinayake@gmail.com](mailto:bodinayake@gmail.com)

13 Faculty of Medicine, University of Ruhuna, PO Box 70, Galle, 80000 Sri Lanka

14 **ORCiDs:**

15 Champica K. Bodinayake: 0000-0003-1339-1883

16 L. Gayani Tillekeratne: 0000-0001-6012-7271

17 **Running title:** Anxiety and depression in acute febrile illness patients

18

19

20

21

22

**NOTE: This preprint reports new research that has not been certified by peer review and should not be used to guide clinical practice.**

23 **Abstract:**

24 Introduction: Acute febrile illnesses (AFI) such as dengue, leptospirosis, and influenza result  
25 in large numbers of hospitalization in the tropics. These illnesses may negatively impact  
26 patients' mental health. We evaluated the prevalence of anxiety and depression and risk  
27 factors associated with these conditions in patients hospitalized with AFI. Methodology:  
28 From July- October 2017, we conducted a cross-sectional study of consecutive patients  $\geq 12$   
29 years admitted with AFI to a tertiary care hospital in Sri Lanka. We administered the Hospital  
30 Anxiety and Depression Scale (HADS) validated in the local language of Sinhala to identify  
31 the presence and severity of anxiety and depression. We identified the prevalence of anxiety  
32 and depression and determined the association with sociodemographic and clinical  
33 characteristics using Chi square and t-tests and multivariabele logistic regression. Results: Of  
34 193 enrolled, 44.6% were male. AFI included dengue (62.7%), viral fever (10.4%), urinary  
35 tract infection (6.2%), leptospirosis (4.7%), pneumonia (3.1%) and typhus (0.5%). Overall,  
36 41.4% patients had anxiety and 42.5% had depression. On multivariable analysis, anxiety was  
37 associated with awareness of diagnosis (OR=4.3, CI 1.3-13.76, p=.03), lower satisfaction  
38 score (OR=0.73, CI 0.58-0.92, p=.008) and lower income (OR=1.92, CI 1.03-3.57, p=.03).  
39 Depression was associated with anorexia (OR=2.8, CI 1.33-5.87, p=.006) and diarrhea  
40 (OR=2.29, CI 1.17-4.47, p=.01). Conclusions: Patients hospitalized with AFI had a high  
41 prevalence of anxiety and depression. Gastrointestinal symptoms, lower socioeconomic  
42 status, and awareness of illness diagnosis were all associated with anxiety. Our findings may  
43 be helpful in developing interventions to counteract anxiety and depression among patients  
44 hospitalized with AFI.

45 **Keywords:** acute febrile illness; dengue; anxiety; depression; Sri Lanka

46

## 47 **Introduction**

48 Acute febrile illness (AFI) is a common cause of hospitalization in the tropics and sub-tropics  
49 (1). Worldwide, few studies report on the mental health of patients hospitalized with AFI (2,  
50 3). Published studies indicate a high prevalence of anxiety and depression among patients  
51 with dengue and other AFI caused by ebola, influenza and SARS-CoV-2 (4-9). Illnesses such  
52 as acute dengue, in particular, may cause psychological distress among those affected due to  
53 the potentially life-threatening nature of the disease (10). Anxiety and depression may have  
54 short and long-term ramifications in terms of disease outcome and illness recovery for both  
55 the patient and the family (11-13).

56

57 In this study, we sought to evaluate the prevalence and the severity of anxiety and depression  
58 in patients both with AFI admitted to a tertiary care center. We investigated  
59 sociodemographic, clinical and other risk factors associated with anxiety and depression to  
60 assist in the development of coping strategies and support systems to improve mental health  
61 among patients with AFI.

## 62 **Methodology**

### 63 ***Study Cohort***

64 We conducted a cross-sectional study at Teaching Hospital Karapitiya (THK), Galle, the  
65 largest tertiary care center (1,800 bed) in the Southern Province of Sri Lanka. We enrolled  
66 consecutive patients  $\geq 12$  years admitted to THK with self-reported or documented fever  
67 within one week of admission, from 1<sup>st</sup> of July to 30<sup>th</sup> September 2017. Study doctors verified  
68 eligibility and obtained written informed consent from patients or parents for children 12-17  
69 years of age. Ethical clearance was obtained from the Ethical Review Committee of the  
70 Faculty of Medicine, University of Ruhuna, Sri Lanka.

71 ***Definitions***

72 Since dengue is the most common reason for hospitalization due to AFI in our setting, we  
73 analyzed and non-dengue AFI groups separately. We defined acute dengue as patients who  
74 had a positive dengue NS1 antigen test or a positive dengue IgM antibody test (if fever >5  
75 days). Patients who were test negative for dengue or who had an alternative clinical diagnosis  
76 confirmed or supported by other investigations were considered as non-dengue AFI.

77 ***Study Instruments***

78 The Hospital Anxiety and Depression Scale (HADS) developed by Zigmond and Snaith to  
79 measure both anxiety and depression among general medical patients was used in this study  
80 (14). The Sinhala translation of this tool has been validated in Sri Lanka (15). The validated  
81 Sinhala version was administered to patients by the trained study doctors. HADS has 7 items  
82 each to estimate the level of anxiety and depression, with each item scored on a scale of 0-3,  
83 giving a total score ranging from 0-21 for anxiety and depression each. A HADS score  $\geq 8$   
84 indicated the presence of anxiety or depression and the level of anxiety or depression was  
85 graded as mild (8-11), moderate (12-14) or severe (15-21) according to the HADS  
86 instrument.

87 We collected information about patients' self-perceived knowledge regarding 6 domains: the  
88 current illness diagnosis, etiology, symptoms, treatment, complications and possible  
89 preventive measures. We used a Likert scale, with each domain having a score of 0-2,  
90 totaling to a maximum of 12. Similarly, we collected information about patients' satisfaction  
91 within the three domains of their medical care, nursing care, and facilities provided by the  
92 hospital, with each domain scored on a 0-4 scale and a maximum total of 12.

93 ***Statistical Methods***

94 We determined the proportion of patients with acute dengue versus non-dengue AFI and the  
95 median and interquartile range (IQR) scores on the HADS and Likert scales. We determined  
96 the association between patient's sociodemographic and clinical characteristics with the  
97 presence of anxiety or depression. We used the Chi square test for categorical variables and  
98 the t-test for continuous variables. Independent variables with significance of  $p < 0.05$  were  
99 entered into a multivariable logistic regression model to determine factors that were  
100 associated with anxiety and depression separately. All statistical analyses were conducted  
101 using STATA, version 11 (STATA Corp, College Station, Texas).

## 102 **Results**

### 103 *Sociodemographic and Clinical Characteristics in Study Cohort*

104 Of a total of 193 enrolled patients, 86 (44.6%) were male and the median age was 35 years  
105 (IQR 25- 53; Table 1). Acute dengue was confirmed in 121 (62.7%) by laboratory testing.  
106 Clinical diagnoses among the non-dengue AFI group included unspecified viral fever (20,  
107 10.4%), urinary tract infection (12, 6.2%), leptospirosis (9, 4.7%), pneumonia (6, 3.1%) and  
108 scrub typhus (2, 0.5%). The majority of patients in this cohort (179, 92.8%) reported having  
109 family support during this acute illness. Most patients reported symptoms such as anorexia  
110 (141, 72.1%), headache (135, 70.0%), and arthralgia/ myalgia (142, 73.6%).

111 Sociodemographic features were not significantly different among dengue versus non-dengue  
112 AFI, with the exception of occupation. Patients with dengue were less likely to be  
113 unemployed or retired compared to patients with non-dengue AFI (45.5% versus 65.3%,  
114 respectively). Patients with dengue were significantly more likely to be symptomatic with  
115 headache (75.2% versus 61.1%,  $p=.03$ ) and arthralgia/myalgia (81.8% versus 59.7%,  
116  $p<.001$ ) than patients with non-dengue AFI.

### 117 *Self-Reported Knowledge Score*

118 Almost all (115, 95%) patients with dengue and a majority (57, 79%) of patients with non-  
119 dengue AFI were aware of their current illness diagnosis, as conveyed to them by their  
120 treating physicians. The median overall score for self-reported knowledge regarding their  
121 illness was 5 (IQR 2-6) in the overall study group. A significant difference between the self-  
122 reported knowledge scores was present between dengue and non-dengue AFI groups (5, IQR  
123 3.5-6 versus 2, IQR 0-5,  $p<.001$ ). The source of knowledge was reported as media by 50%  
124 and as health care personnel by 40%. Two-thirds of dengue patients (81, 66.9%) reported  
125 their source of knowledge as media, compared to 20.8% (15) in the non-dengue AFI group.

#### 126 *Anxiety and Depression in the Overall Study Cohort*

127 In the overall study group, the median HADS anxiety score was 7 (IQR 4-9) and the median  
128 HADS depression score was 7 (IQR 4-10). Overall, 80 (41.4%) patients had anxiety and 82  
129 (42.5%) had depression according to the HADS scoring. A total of 110 (56.99%) had either  
130 anxiety or depression, while 52 (26.9%) had both anxiety and depression. Among the 80  
131 patients with anxiety in the overall study cohort, 52 (26.9%) had mild anxiety, 20 (10.4%)  
132 had moderate anxiety, and 8 (4.2%) had severe anxiety. Among the 82 patients with  
133 depression in the overall study cohort, 34 (17.6%) had mild depression, 36 (18.7%) had  
134 moderate depression, and 12 (6.2%) had severe depression.

#### 135 *Unadjusted Analysis of Sociodemographic and Clinical Features Associated with Anxiety* 136 *or Depression*

137 Among the study cohort, patients with anxiety were more likely to be from lower-income  
138 groups than patients from higher-income groups (46.3% vs 31.0,  $p= .03$ ; Table 2). No  
139 sociodemographic features were associated with depression. Anorexia (81.3% vs 67.3%,  
140  $p=.03$ ), diarrhea (36.3% vs 21.2%,  $p=.02$ ), and arthralgia/myalgia (81.3% vs 68.1%,  $p=.04$ )  
141 were associated with anxiety. Anorexia (85.4% vs 64.0%,  $p=.001$ ), headache (82.9% vs

142 60.4%,  $p=.001$ ), vomiting (62.2% vs 41.4%,  $p=.004$ ), diarrhea (39.0% vs 18.9%  $p= .002$ ),  
143 and abdominal pain (32.9% vs 19.8.0%,  $p=.04$ ) were associated with depression. Awareness  
144 of diagnosis (95.0% vs 86.0%,  $p= .03$ ) and having lower overall satisfaction scores were  
145 associated with anxiety ( $p=.007$ ). Knowledge and satisfaction scores were not associated with  
146 depression.

### 147 *Adjusted Analysis of Sociodemographic and Clinical Features Associated with Anxiety or* 148 *Depression*

149 On multivariable analysis, lower income (1.92, 95% CI 1.03-3.57), patient awareness of their  
150 diagnosis (4.30, 1.3-13.76), and overall satisfaction score (OR 0.73, CI 0.58- 0.92) were  
151 associated with anxiety (Table 3). Anorexia (OR 2.8, CI 1.33- 5.87) and diarrhoea (OR 2.29,  
152 CI 1.17-4.47) were associated with depression. The presence of family support, presence of  
153 comorbidities, or knowledge score regarding current illness were not associated with anxiety  
154 or depression on multivariable analysis.

155

156 There was no significant difference between dengue versus non-dengue AFI and the presence  
157 of anxiety or depression (43.8% vs 37.5%,  $p= .39$ ; Table 4). No significant difference was  
158 also found between the dengue and non-dengue AFI groups with regards to severity of  
159 anxiety or depression.

### 160 **Discussion**

161 We found a high prevalence of anxiety and depression in patients hospitalized with AFI in Sri  
162 Lanka. High prevalence of anxiety and depression was seen in patients with both dengue and  
163 non-dengue AFI. A diagnosis of dengue was not specifically associated with a higher  
164 prevalence of anxiety or depression when compared to other AFI. The majority of the cohort  
165 had mild or moderate levels of anxiety and depression, but a small but significant proportion

166 had severe anxiety or depression. Anxiety was associated with lower socioeconomic status,  
167 awareness of illness diagnosis, and lower overall satisfaction score. Depression was  
168 associated with gastrointestinal symptoms such as anorexia and diarrhoea. Notably, patients  
169 with dengue were more aware of their illness diagnosis and had a higher self-reported  
170 knowledge score.

171

172 According to our findings, 57% of patients hospitalized with AFI had anxiety or depression  
173 as measured by the HADS instrument. No other published studies to-date have assessed  
174 anxiety and depression in cohorts with AFI, but several studies have reported similar  
175 proportions of anxiety or depression among patients with acute dengue or other specific  
176 diseases causing AFI. In a study performed by Hashmi *et al.* using the HADS among patients  
177 hospitalized with dengue in Pakistan, 60% met criteria for anxiety and 62.2% met criteria for  
178 depression (16). Tran *et al.* showed 64.1% prevalence of anxiety or depression among  
179 patients hospitalized with dengue by applying a health-related quality-of-life (HRQOL)  
180 survey in Vietnam (5). In Brazil, a case-control study of patients with chikungunya showed  
181 significant levels of anxiety and depression (2). In Taiwan, patients with leptospirosis had a  
182 1.58-fold higher risk of depression than the general population (3). During the COVID-19  
183 pandemic, multiple studies evaluated anxiety and depression among patients with COVID-19.  
184 In a meta-analysis performed by Deng *et al.*, the pooled prevalence of depression and anxiety  
185 was 45% and 47%, respectively, among patients with COVID-19 (7). Our study confirms the  
186 high levels of anxiety and depression in a cohort with diverse etiologies of AFI, not limited to  
187 specific conditions. The underlying reasons for the high prevalence of mental health  
188 conditions in patients with AFI are likely multifactorial. Among older adults, cytokine  
189 responses to influenza virus have been shown to be associated with mood disturbance,  
190 suggesting one possible pathophysiological link (9).

191 Of note, we found that gastrointestinal symptoms were associated with a high prevalence of  
192 depression. A few other studies have reported an association between symptoms related to the  
193 gastrointestinal system and anxiety or depression. In Norway, nausea, heartburn, diarrhea,  
194 and constipation were associated with anxiety and depression when using the HADS  
195 instrument in the general population (17). Among patients at 15 primary care clinics in the  
196 US, patients with gastrointestinal symptoms such as stomach pain, constipation and diarrhea  
197 were more likely to have anxiety and depression (18). An exact mechanism for the above  
198 association is not yet evident.

199

200 We found that patients who were aware of their illness diagnosis were more likely to  
201 experience anxiety, a finding which contrasts with results from earlier studies. According to a  
202 systematic review on the relation between information provision, anxiety, and depression  
203 among cancer survivors, satisfied patients and patients with fulfilled information needs had  
204 less anxiety and depression (19). Among patients with chronic obstructive pulmonary  
205 disease, less disease knowledge was associated with anxiety or depression when using the  
206 HADS instrument (20). However, Selinger *et al.* showed that better disease knowledge was  
207 associated with greater anxiety among patients with inflammatory bowel disease (21).

208

209 In our study, anxiety was higher among patients of a lower socioeconomic status (generally  
210 earning less than USD 5 per day). It is likely that the loss of wages due to the acute illness  
211 may result in worse mental health for patients. Patients hospitalized with AFI may benefit  
212 from coping strategies to deal with the anxiety and depression associated with their acute  
213 illness. Strategies such as positive reframing, acceptance of the stressful situation, and use of  
214 humor may be helpful interventions in improving the quality of care of these patients.

215

216 Some limitations must be noted. Our study was performed at a single center where dengue  
217 was prevalent. However, as the causes of AFI were heterogenous, our findings may be  
218 generalizable to other settings with AFI. Strengths of this study include the use of a locally  
219 validated instrument to measure anxiety and depression and the prospective, systematic  
220 collection of data.

221

## 222 **Conclusions**

223 We showed that patients hospitalized with AFI had a high prevalence of anxiety and  
224 depression. Gastrointestinal symptoms, lower socioeconomic status, better awareness of  
225 illness diagnosis and lower satisfaction score were associated with anxiety or depression. Our  
226 findings highlight the need for developing interventions to reduce anxiety and depression  
227 among patients hospitalized with AFI in similar settings.

228

229 **Acknowledgments:** We would like to acknowledge the patients who were involved in this  
230 study.

231 **Declaration of Interest statement:** The authors declare no conflict of interest.

232 **Institutional Review Board Statement:** The study was conducted according to the  
233 guidelines of the Declaration of Helsinki, and approved by the Ethical Review Committee of  
234 the Faculty of Medicine, University of Ruhuna. ERC approval No: 14.06.2017:3.10

235 **Informed Consent Statement:** Written informed consent was obtained from all subjects or  
236 Parents of children involved in the study.

237 **Consent for publication:** All authors have agreed and give their consented to publish

238 **Funding:** This research received no external funding.

239 **Author Contributions:** Conceptualization, Champica Bodinayake; Formal analysis,  
240 Champica Bodinayake, Wasana Ranaweera Arachchige and L. Gayani Tillekeratne;  
241 Investigation, Champica Bodinayake, Wasana Ranaweera Arachchige, Senuri Sahabandu,  
242 Aruna Pushpakumara, Piyumi Wijayaratna and Bhagya Jayasekera; Methodology, Champica  
243 Bodinayake, Ajith De Silva Nagahawatta, Wasana Ranaweera Arachchige, Senuri  
244 Sahabandu, Aruna Pushpakumara, Piyumi Wijayaratna and Bhagya Jayasekera; Project  
245 administration, Champica Bodinayake, Ajith De Silva Nagahawatta; Supervision, Champica  
246 Bodinayake, Ajith De Silva Nagahawatta; Writing – original draft, Champica Bodinayake;  
247 Writing – review & editing, Champica Bodinayake, Ajith De Silva Nagahawatta, Wasana  
248 Ranaweera Arachchige, Senuri Sahabandu, Aruna Pushpakumara, Piyumi Wijayaratna,  
249 Bhagya Jayasekera and L. Gayani Tillekeratne.

250 **Data Availability Statement:** The datasets generated and/or analysed during the current  
251 study are not publicly available due to ethical considerations/ restrictions but may be  
252 available from the corresponding author on reasonable request.

253 **Data Deposition: Not applicable**

254 **Geolocation information: Not applicable**

## 255 **References**

- 256 1. Rhee C, Kharod GA, Schaad N, Furukawa NW, Vora NM, Blaney DD, et al. Global  
257 knowledge gaps in acute febrile illness etiologic investigations: A scoping review. PLoS neglected  
258 tropical diseases. 2019;13(11):e0007792.
- 259 2. de Lima Martins H, dos Santos C, Ribas V, Sougey E, Valenca M. Depression, Anxiety, and  
260 Hopelessness in Patients with Chikungunya Fever in Brazil. Journal of Neuroinfectious Diseases.  
261 2016;7(4).
- 262 3. Chiu CH, Wang YC, Lin CL, Lee FY, Kao CH. Leptospirosis and Depression: A Nationwide  
263 Cohort Analysis. J Clin Psychiatry. 2017;78(4):e398-e403.
- 264 4. Gunathilaka N, Chandradasa M, Champika L, Siriwardana S, Wijesooriya L. Delayed anxiety  
265 and depressive morbidity among dengue patients in a multi-ethnic urban setting: first report from Sri  
266 Lanka. Int J Ment Health Syst. 2018;12:20.
- 267 5. Tran BX, Thu Vu G, Hoang Nguyen L, Tuan Le Nguyen A, Thanh Tran T, Thanh Nguyen B,  
268 et al. Cost-of-Illness and the Health-Related Quality of Life of Patients in the Dengue Fever Outbreak  
269 in Hanoi in 2017. International journal of environmental research and public health. 2018;15(6).

- 270 6. Herbuela V, de Guzman FS, Sobrepeña GD, Claudio ABF, Tomas ACV, Arriola-Delos Reyes  
271 CM, et al. Depressive and Anxiety Symptoms among Pediatric In-Patients with Dengue Fever: A  
272 Case-Control Study. *International journal of environmental research and public health*. 2019;17(1).
- 273 7. Deng J, Zhou F, Hou W, Silver Z, Wong CY, Chang O, et al. The prevalence of depression,  
274 anxiety, and sleep disturbances in COVID-19 patients: a meta-analysis. *Ann N Y Acad Sci*.  
275 2021;1486(1):90-111.
- 276 8. Secor A, Macauley R, Stan L, Kagone M, Sidikiba S, Sow S, et al. Mental health among Ebola  
277 survivors in Liberia, Sierra Leone and Guinea: results from a cross-sectional study. *BMJ open*.  
278 2020;10(5):e035217.
- 279 9. Costanzo ES, Lutgendorf SK, Kohut ML, Nisly N, Rozeboom K, Spooner S, et al. Mood and  
280 cytokine response to influenza virus in older adults. *J Gerontol A Biol Sci Med Sci*. 2004;59(12):1328-  
281 33.
- 282 10. Daudé É, Mazumdar S, Solanki V. Widespread fear of dengue transmission but poor practices  
283 of dengue prevention: A study in the slums of Delhi, India. *PloS one*. 2017;12(2):e0171543.
- 284 11. Sobel RM, Markov D. The impact of anxiety and mood disorders on physical disease: the  
285 worried not-so-well. *Curr Psychiatry Rep*. 2005;7(3):206-12.
- 286 12. Lamers SM, Bolier L, Westerhof GJ, Smit F, Bohlmeijer ET. The impact of emotional well-  
287 being on long-term recovery and survival in physical illness: a meta-analysis. *J Behav Med*.  
288 2012;35(5):538-47.
- 289 13. Barnason S, Zimmerman L, Nieveen J, Schulz P, Young L. Patient recovery and transitions  
290 after hospitalization for acute cardiac events: an integrative review. *J Cardiovasc Nurs*. 2012;27(2):175-  
291 91.
- 292 14. Stern AF. The hospital anxiety and depression scale. *Occup Med (Lond)*. 2014;64(5):393-4.
- 293 15. Suraweera C, Hanwella R, Sivayokan S, de Silva V. Rating scales validated for Sri Lankan  
294 populations. *Sri Lanka Journal of Population Studies*. 2013;4(2):16-24.
- 295 16. Hashmi AM, Butt Z, Idrees Z, Niazi M, Yousaf Z, Haider SF, et al. Anxiety and depression  
296 symptoms in patients with dengue fever and their correlation with symptom severity. *Int J Psychiatry*  
297 *Med*. 2012;44(3):199-210.
- 298 17. Haug TT, Mykletun A, Dahl AA. Are anxiety and depression related to gastrointestinal  
299 symptoms in the general population? *Scand J Gastroenterol*. 2002;37(3):294-8.
- 300 18. Mussell M, Kroenke K, Spitzer RL, Williams JB, Herzog W, Löwe B. Gastrointestinal  
301 symptoms in primary care: prevalence and association with depression and anxiety. *J Psychosom Res*.  
302 2008;64(6):605-12.
- 303 19. Husson O, Mols F, van de Poll-Franse LV. The relation between information provision and  
304 health-related quality of life, anxiety and depression among cancer survivors: a systematic review.  
305 *Ann Oncol*. 2011;22(4):761-72.
- 306 20. Zhang Q, Liao J, Liao X, Wu X, Wan M, Wang C, et al. Disease knowledge level is a  
307 noteworthy risk factor of anxiety and depression in patients with chronic obstructive pulmonary  
308 disease: a cross-sectional study. *BMC pulmonary medicine*. 2014;14:92.
- 309 21. Selinger CP, Lal S, Eaden J, Jones DB, Katelaris P, Chapman G, et al. Better disease specific  
310 patient knowledge is associated with greater anxiety in inflammatory bowel disease. *J Crohns Colitis*.  
311 2013;7(6):e214-8.
- 312 22. Lanka CBoS. Indicative US Dollar SPOT Exchange Rate 2018 [Available from:  
313 [https://www.cbsl.gov.lk/en/rates-and-indicators/exchange-rates/daily-indicative-usd-spot-exchange-](https://www.cbsl.gov.lk/en/rates-and-indicators/exchange-rates/daily-indicative-usd-spot-exchange-rates)  
314 [rates](https://www.cbsl.gov.lk/en/rates-and-indicators/exchange-rates/daily-indicative-usd-spot-exchange-rates).  
315

316

317

318 **Table 1.** Sociodemographic and clinical characteristics of patients with dengue and non-  
 319 dengue acute febrile illness in Sri Lanka.

|                                           | <b>Total number (%) or median (IQR) n= 193</b> | <b>Dengue number (%) or median (IQR) n= 121</b> | <b>Non-dengue AFI number (%) or median (IQR) n= 72</b> | <b>p-value</b> |
|-------------------------------------------|------------------------------------------------|-------------------------------------------------|--------------------------------------------------------|----------------|
| <b>Sociodemographic characteristics</b>   |                                                |                                                 |                                                        |                |
| Age (years)                               | 35 (25-53)                                     | 32 (23- 47)                                     | 42.5 (24.0- 63.0)                                      | <b>.01</b>     |
| Male                                      | 86 (44.6)                                      | 61 (50.4)                                       | 25 (34.7)                                              | <b>.03</b>     |
| Hospital distance (km)                    | 13.0 (5-25)                                    | 13.0 (5.0- 20.5)                                | 15.0 (5.5- 30.0)                                       | .19            |
| Education                                 |                                                |                                                 |                                                        |                |
| Up to GCE O/L (10 <sup>th</sup> grade)    | 52 (26.9)                                      | 29 (24.0)                                       | 23 (31.9)                                              | .27            |
| Passed GCE O/L (10 <sup>th</sup> grade)   | 75 (38.9)                                      | 46 (38.0)                                       | 29 (40.3)                                              |                |
| GCE A/L or above (12 <sup>th</sup> grade) | 66 (34.2)                                      | 46 (38.0)                                       | 20 (27.9)                                              |                |
| Occupation                                |                                                |                                                 |                                                        |                |
| Office/ factory/ business                 | 53 (27.7)                                      | 40 (33.1)                                       | 13 (18.1)                                              | <b>.01</b>     |
| Laborer/ agriculture                      | 38 (19.7)                                      | 26 (21.5)                                       | 12 (16.7)                                              |                |
| Unemployed/ retired/ student              | 102 (52.9)                                     | 55 (45.5)                                       | 47 (65.3)                                              |                |
| Marital status- married                   | 123 (63.7)                                     | 73 (60.3)                                       | 50 (69.4)                                              | .12            |
| Income per month                          |                                                |                                                 |                                                        |                |
| ≤25,000 Rs/ ≤162.86 USD*                  | 72 (37.3)                                      | 43 (35.5)                                       | 29 (40.3)                                              | .54            |
| >25,000 Rs/ >162.86 USD*                  | 121 (62.7)                                     | 78 (64.5)                                       | 43 (59.7)                                              |                |
| Family support present                    | 179 (92.8)                                     | 113 (93.4)                                      | 66 (91.7)                                              | .66            |
| <b>Clinical features</b>                  |                                                |                                                 |                                                        |                |

|                                                      |            |            |           |                 |
|------------------------------------------------------|------------|------------|-----------|-----------------|
| Days fever prior to admission                        | 3 (2-4)    | 3 (2-4)    | 3 (2-5)   | <b>&lt;.001</b> |
| Days of hospitalization at enrollment                | 3 (2-4)    | 3 (2-4)    | 3 (2-5)   | <b>.04</b>      |
| Anorexia                                             | 141 (73.1) | 89 (73.6)  | 52 (72.2) | .84             |
| Headache                                             | 135 (70.0) | 91(75.21)  | 44 (61.1) | <b>.04</b>      |
| Vomiting                                             | 97 (50.3)  | 60 (49.6)  | 37 (51.4) | .81             |
| Diarrhea                                             | 53 (27.5)  | 37 (30.6)  | 16 (22.2) | .21             |
| Arthralgia/ myalgia                                  | 142 (73.6) | 99 (81.8)  | 43 (59.7) | <b>&lt;.001</b> |
| Cough                                                | 44 (22.8)  | 29 (24.0)  | 15 (20.8) | .62             |
| Abdominal pain                                       | 49 (25.4)  | 24 (19.8)  | 25 (34.7) | <b>.02</b>      |
| Comorbidities <sup>+</sup>                           | 54 (28.0)  | 22 (18.2)  | 32 (44.4) | <b>&lt;.001</b> |
| Receipt of oral medications                          | 188 (97.4) | 117 (96.7) | 71 (98.6) | .43             |
| Receipt of intravenous medications                   | 69 (35.8)  | 24 (19.8)  | 45 (62.5) | <b>&lt;.001</b> |
| Receipt of intravenous fluid                         | 167 (86.5) | 110 (90.9) | 57 (79.2) | <b>.03</b>      |
| <b>Patients' perceptions regarding their illness</b> |            |            |           |                 |
| Patient awareness of diagnosis                       | 172 (89.1) | 115 (95.0) | 57 (79.2) | <b>.001</b>     |
| Self-perceived knowledge score (out of maximal 12)   | 5 (2-6)    | 5 (3.5-6)  | 2 (0-5)   | <b>&lt;.001</b> |
| Overall satisfaction score (out of maximal 12)       | 9 (9-11)   | 9 (9-11)   | 9 (9-11)  | 0.94            |

320 Abbreviations: AFI = acute febrile illness; GCE O/L = General Certificate of Education

321 Ordinary Level, 10<sup>th</sup> grade; GCE A/L = General Certificate of Education Advanced

322 Level, 12<sup>th</sup> grade. \* 1 USD = 153.51 Rs in July 2017 (22); <sup>+</sup>Diabetes mellitus,

323 hypertension, dyslipidemia, ischemic heart disease, asthma.

324

325

326 **Table 2.** Sociodemographic and clinical characteristics associated with anxiety and

327 depression among patients with acute febrile illness in Sri Lanka.

| Characteristic                            | Anxiety                                  |                                          |                  |            | Depression               |                          |                  |             |
|-------------------------------------------|------------------------------------------|------------------------------------------|------------------|------------|--------------------------|--------------------------|------------------|-------------|
|                                           | Present Number (%) or median (IQR) n= 80 | Absent Number (%) or median (IQR) n= 113 | OR (CI)          | p-value    | Present Number (%) n= 82 | Absent Number (%) n= 111 | OR (CI)          | p-value     |
| Age (years)                               | 36.5 (23.3-59.3)                         | 35.0 (23.0-52.0)                         |                  | .33        | 36.0 (23.0-55.3)         | 35.0 (23.0-53.0)         |                  | .67         |
| Male                                      | 33 (41.3)                                | 53 (46.9)                                | 0.80 (0.45-1.42) | .44        | 34 (41.5)                | 52 (46.9)                | 0.80 (0.45-1.43) | .46         |
| Education                                 |                                          |                                          |                  |            |                          |                          |                  |             |
| Up to GCE O/L (10 <sup>th</sup> grade)    | 19 (23.8)                                | 33 (29.2)                                | 0.76 (0.37-1.52) | .40        | 22 (26.8)                | 30 (27.0)                | 0.99 (0.49-1.97) | .98         |
| Passed GCE O/L (10 <sup>th</sup> grade)   | 36 (45.0)                                | 39 (34.5)                                | 1.55 (0.83-2.91) | .14        | 33 (40.2)                | 42 (37.8)                | 1.11 (0.59-2.07) | .75         |
| GCE A/L or above (12 <sup>th</sup> grade) | 25 (31.3)                                | 41 (36.3)                                | 0.80 (0.41-1.53) | .47        | 27 (32.9)                | 39 (35.1)                | 0.91 (0.47-1.73) |             |
| Marital status-married                    | 55 (68.8)                                | 68 (60.2)                                | 1.48 (0.77-2.87) | .21        | 55 (67.1)                | 68 (61.3)                | 1.31 (0.68-2.51) | .39         |
| Income per month ≤25,000 Rs/ ≤162.86 USD* | 37 (46.3)                                | 35 (31.0)                                | 1.01 (1.06-3.62) | <b>.03</b> | 29 (35.4)                | 43 (38.7)                | 0.87 (0.46-1.63) | .63         |
| Family support present                    | 74 (92.5)                                | 105 (92.9)                               | 0.94 (0.27-3.43) | .91        | 76 (92.7)                | 103 (92.8)               | 0.98 (0.29-3.59) | 0.98        |
| Anorexia                                  | 65 (81.3)                                | 76 (67.3)                                | 2.11 (1.02-4.51) | <b>.03</b> | 70 (85.4)                | 71 (64.0)                | 3.29 (1.53-7.44) | <b>.001</b> |
| Headache                                  | 61 (76.3)                                | 74 (65.5)                                | 1.69 (0.85-3.43) | .11        | 68 (82.9)                | 67 (60.4)                | 3.19 (1.53-      | <b>.001</b> |

|                                        |           |            |                   |             |            |            |                  |             |
|----------------------------------------|-----------|------------|-------------------|-------------|------------|------------|------------------|-------------|
|                                        |           |            |                   |             |            |            | 6.87)            |             |
| Vomiting                               | 41 (51.3) | 56 (49.6)  | 1.07 (0.58-1.98)  | .82         | 51 (62.2)  | 46 (41.4)  | 2.32 (1.24-4.36) | <b>.004</b> |
| Diarrhea                               | 29 (36.3) | 24 (21.2)  | 2.11 (1.06-4.21)  | <b>.02</b>  | 32 (39.0)  | 21 (18.9)  | 2.74 (1.36-5.55) | <b>.002</b> |
| Arthralgia/myalgia                     | 65 (81.3) | 77 (68.1)  | 2.03 (0.98-4.34)  | <b>.04</b>  | 65 (79.27) | 77 (69.37) | 1.69 (0.83-3.53) | .12         |
| Cough                                  | 22 (27.5) | 22 (19.5)  | 1.57 (0.75-3.26)  | .19         | 19 (23.2)  | 25 (22.5)  | 1.04 (0.49-2.16) | .92         |
| Abdominal pain                         | 24 (30.0) | 25 (22.1)  | 1.51 (0.74-3.05)  | .22         | 27 (32.9)  | 22 (19.8)  | 1.99 (0.98-4.04) | <b>.04</b>  |
| Presence of comorbidities <sup>+</sup> | 19 (23.8) | 35 (31.0)  | 0.69 (0.34-1.39)  | .27         | 24 (29.3)  | 30 (27.0)  | 1.12 (0.56-2.21) | .73         |
| Use of oral drugs                      | 77 (96.3) | 111 (98.2) | 0.46 (0.04-4.15)  | .39         | 78 (95.1)  | 110 (99.1) | 0.18 (0.00-1.85) | .09         |
| Use of intravenous drugs               | 35 (43.8) | 34 (30.1)  | 1.81 (0.95-3.43)  | .05         | 34 (41.5)  | 35 (31.5)  | 1.54 (0.81-2.91) | .15         |
| Use of intravenous fluid               | 70 (87.5) | 97 (85.8)  | 1.15 (0.46-3.03)  | .74         | 71 (86.6)  | 96 (86.5)  | 1.01 (0.40-2.59) | .98         |
| Patient awareness of diagnosis         | 76 (95.0) | 96 (86.0)  | 3.36 (1.03-14.24) | <b>.03</b>  | 74 (90.2)  | 98 (88.3)  | 1.23 (0.44-3.60) | .67         |
| Self-perceived knowledge score         | 6 (2-7)   | 5 (3-7)    |                   | .77         | 6 (3-7)    | 5 (2-7)    |                  | .43         |
| Overall satisfaction score             | 9 (9-10)  | 9 (9-11)   |                   | <b>.007</b> | 9 (9-10)   | 9 (9-12)   |                  | .06         |

328

329 <sup>+</sup>Diabetes mellitus, hypertension, dyslipidemia, ischemic heart disease, asthma.

330 Abbreviations: OR = odds ratio, CI = confidence interval

331

332 **Table 3.** Multivariable analysis of sociodemographic and clinical features associated with  
 333 anxiety or depression among patients hospitalized with acute febrile illness in Sri Lanka.

| <b>Characteristic</b>  | <b>Unadjusted OR<br/>(95% CI)</b> | <b>p-<br/>value</b> | <b>Adjusted final model<br/>OR (95% CI)</b> | <b>p-value</b> |
|------------------------|-----------------------------------|---------------------|---------------------------------------------|----------------|
| <b>Anxiety</b>         |                                   |                     |                                             |                |
| Income                 | 1.92 (1.06-3.62)                  | .03                 | 1.92 (1.03-3.57)                            | .03            |
| Awareness of diagnosis | 3.36 (1.03-14.24)                 | .03                 | 4.30 (1.3-13.76)                            | .01            |
| Satisfaction score     |                                   | .007                | 0.73(0.58- 0.92)                            | .008           |
| <b>Depression</b>      |                                   |                     |                                             |                |
| Anorexia               | 3.29 (1.53-7.44)                  | .03                 | 2.80 (1.33- 5.87)                           | .006           |
| Diarrhoea              | 2.74 (1.36-5.55)                  | .02                 | 2.29(1.17-4.47)                             | .01            |

334 Abbreviations: OR = odds ratio, CI = confidence interval

335

336

337

338

339

340

341

342

343

344

345

346 **Table 4.** Anxiety and depression according to the Hospital Anxiety and Depression Scale  
 347 (HADS) among patients with dengue and non-dengue AFI in Sri Lanka.

|                                        | <b>All patients<br/>Number (%)<br/>or median<br/>(IQR)</b> | <b>Dengue<br/>Number (%)<br/>or median<br/>(IQR)</b> | <b>Non-dengue<br/>AFI<br/>Number (%)<br/>or median<br/>(IQR)</b> | <b>p-value</b> |
|----------------------------------------|------------------------------------------------------------|------------------------------------------------------|------------------------------------------------------------------|----------------|
| Anxiety present                        | 80 (41.5)                                                  | 53 (43.8)                                            | 27 (37.5)                                                        | .39            |
| Depression present                     | 82 (42.5)                                                  | 49 (40.5)                                            | 33 (45.8)                                                        | .47            |
| Anxiety and depression<br>both present | 52 (26.9)                                                  | 31 (25.6)                                            | 21 (29.2)                                                        | .59            |
| Anxiety score                          | 7 (4-9)                                                    | 7 (4-9)                                              | 7 (4-8.5)                                                        | .78            |
| Depression score                       | 7 (4 -10)                                                  | 7 (4-10)                                             | 7 (4-11)                                                         | .51            |
| Anxiety severity                       |                                                            |                                                      |                                                                  |                |
| Mild                                   | 52 (26.9)                                                  | 35 (28.9)                                            | 17 (23.6)                                                        | .42            |
| Moderate                               | 20 (10.4)                                                  | 13 (10.7)                                            | 7 (9.7)                                                          | .82            |
| Severe                                 | 8 (4.2)                                                    | 5 (4.1)                                              | 3 (4.2)                                                          | .99            |
| Depression severity                    |                                                            |                                                      |                                                                  |                |
| Mild                                   | 34 (17.6)                                                  | 21 (17.4)                                            | 13 (18.1)                                                        | .90            |
| Moderate                               | 36 (18.7)                                                  | 21 (17.4)                                            | 15 (20.8)                                                        | .55            |
| Severe                                 | 12 (6.2)                                                   | 7 (5.8)                                              | 5 (6.9)                                                          | .75            |

348 Abbreviations: AFI = acute febrile illness, IQR = interquartile range

349

350
